# Supplementary material
Source: HighWire-hosted journal article supplement (http://www.cmaj.ca/highwire/filestream/147433/field_highwire_adjunct_files/0/220728-res-1-at.pdf)

## **Supplemental Materials**

**Table E1.** ICES Databases used for cohort construction and variable definitions

**Table E2.** Variables included in the propensity score for matching

**Table E3.** Unmatched cohort baseline characteristics

**Table E4.** Complete cohort analyses (N=531,702)\*: (A) Rate ratios\*\*, (B) Absolute differences in per-person-year rates\*\*\*

**Table E5.** Sensitivity analyses: (A) Follow-up begins after hospital discharge or 56 days, whichever occurred later, (B) follow-up censored on the date of entrance to long-term care, and (C) follow-up censored at 6 months.

**Table E5:** Sensitivity analyses in cohort also matched by hospitalization within 2 weeks after PCR test: (A) Follow-up begins after hospital discharge or 56 days, whichever occurred later, (B) follow-up censored on the date of entrance to long-term care, (C) follow-up censored at 6 months, and (D) matched by intensive care admission within two weeks after index date.

**Figure E1:** Differences in rates (per-person-year) of health care use among individuals at the 99<sup>th</sup> percentile of health care utilization, comparing individuals with a positive SARS-CoV-2 PCR test to matched individuals with negative PCR: (A) females (n=271,966), and (B) males (n=259,736).

**Table E1.** ICES Databases used for cohort construction and variable definitions

The following datasets were used for cohort construction, among others (Table E1): OHIP (contains all physician billing claims); the Registered Persons Database (maintains vital statistics, including out-of-hospital deaths); the Ontario Laboratories Information System (contains all PCR results for SARS-CoV-2 and was linked to the COVID19 database, which records all SARS-CoV-2 vaccinations); the Canadian Institute for Health Information Discharge Abstract Database (records all hospitalizations in Ontario); the National Ambulatory Care Reporting System (includes all emergency department visits in Ontario); and the Ministry of Health and Long-Term Care (MOHLTC; residence in long-term care).

Additional details are available at <https://datadictionary.ices.on.ca/Applications/DataDictionary/Default.aspx>

|                                                  |                                         |                                                   |                                            |                                                |                                   |
|--------------------------------------------------|-----------------------------------------|---------------------------------------------------|--------------------------------------------|------------------------------------------------|-----------------------------------|
| Canadian Institute for Health Information (CIHI) | Ontario Health Insurance Plan (OHIP)    | National Ambulatory Care Reporting System (NACRS) | Same Day Surgery (SDS)                     | Ontario Drug Benefit (ODB)                     | Discharge Abstract Database (DAD) |
| Ontario Mental Health Reporting System (OHMRS)   | Registered Persons Database (RPDB)      | Yearly Health Services Contact (CONTACT)          | Home Care Database (HCD)                   | Ontario Laboratories Information System (OLIS) | Ontario Cancer Registry (OCR)     |
| Ontario Marginalization Index (ONMARG)           | Continuing Care Reporting System (CCRS) | Ontario COVID-19 Vaccine Data (COVAXON)           | COVID19 Integrated Testing Data (C19INTGR) |                                                |                                   |
| Ontario Asthma dataset (ASTHMA)                  | Congestive Heart Failure (CHF)          | Chronic Obstructive Pulmonary Disease (COPD)      | Ontario Dementia Database (DEMENTIA)       | Ontario Hypertension Dataset (HYPER)           | Ontario Diabetes Dataset (ODD)    |

### Supplemental Material References

1. Matheson FI, Dunn JR, Smith KL, Moineddin R, Glazier RH. Development of the Canadian Marginalization Index: a new tool for the study of inequality. *Can J Public Health*. 2012;103(8 Suppl 2):S12-16.
2. Aoyama K, Ray JG, Pinto R, et al. Temporal Variations in Incidence and Outcomes of Critical Illness Among Pregnant and Postpartum Women in Canada: A Population-Based Observational Study. *J Obstet Gynaecol Can*. 2019;41(5):631-640.
3. Metcalfe A, Lix LM, Johnson JA, et al. Validation of an obstetric comorbidity index in an external population. *BJOG*. 2015;122(13):1748-1755.
4. Joseph KS, Fahey J, Canadian Perinatal Surveillance S. Validation of perinatal data in the Discharge Abstract Database of the Canadian Institute for Health Information. *Chronic Dis Can*. 2009;29(3):96-100.
5. Samiedaluie S, Peterson S, Brant R, Kaczorowski J, Norman WV. Validating abortion procedure coding in Canadian administrative databases. *BMC Health Serv Res*. 2016;16:255.
6. Tu K, Nieuwlaat R, Cheng SY, et al. Identifying Patients With Atrial Fibrillation in Administrative Data. *Can J Cardiol*. 2016;32(12):1561-1565.
7. Griffin MR, Zhu Y, Moore MR, Whitney CG, Grijalva CG. U.S. hospitalizations for pneumonia after a decade of pneumococcal vaccination. *N Engl J Med*. 2013;369(2):155-163.
8. MHASEF Research Team. Mental Health and Addictions System Performance in Ontario: A Baseline Scorecard. Toronto, ON: Institute for Clinical Evaluative Sciences; 2018. Available from: <https://www.ices.on.ca/Publications/Atlases-and-Reports/2018/MHASEF>.
9. MHASEF Research Team. The Mental Health of Children and Youth in Ontario: 2017 Scorecard. Toronto, ON: Institute for Clinical Evaluative Sciences; 2017. ISBN: 978-1-926850-72-6. Available from: <https://www.ices.on.ca/Publications/Atlases-and-Reports/2017/MHASEF>.
10. ICES Data Dictionary. <https://datadictionary.ices.on.ca/Applications/DataDictionary/Default.aspx>. Last accessed February 11, 2022.

**Table E2. Variables included in the propensity score for matching\*. Source descriptions in Table E1.**

\* also used for hard matching

| Variable                           | Definition and/or source                                                                                                                                                                                                                                                             |
|------------------------------------|--------------------------------------------------------------------------------------------------------------------------------------------------------------------------------------------------------------------------------------------------------------------------------------|
| Sex*                               | Male, female, RPBD                                                                                                                                                                                                                                                                   |
| Week of outbreak*                  | Index date January 28, 2020; two-week blocks                                                                                                                                                                                                                                         |
| Hospitalization*                   | On or within 2 weeks after the index date                                                                                                                                                                                                                                            |
| Public health unit (PHU)*          | OMHRS, DAD                                                                                                                                                                                                                                                                           |
| Age                                | Years, restricted cubic spline                                                                                                                                                                                                                                                       |
| Neighbourhood income quintile      | RPDB, PCCF                                                                                                                                                                                                                                                                           |
| Residential instability            | e.g., percentage living alone, dwellings not owned: ONMARG quintiles <sup>1</sup>                                                                                                                                                                                                    |
| Material deprivation               | e.g., percentage unemployed, without a high school degree: ONMARG quintiles <sup>1</sup>                                                                                                                                                                                             |
| Dependency                         | e.g., percentage of seniors, individuals not participating in the labour force: ONMARG quintiles <sup>1</sup>                                                                                                                                                                        |
| Ethnic concentration               | e.g., percentage of recent immigrants, those who self-identify as a “visible minority”: ONMARG quintiles <sup>1</sup>                                                                                                                                                                |
| Rurality                           | RPDB, PCCF                                                                                                                                                                                                                                                                           |
| Week of outbreak                   | Index date January 28, 2020; two-week blocks                                                                                                                                                                                                                                         |
| Diabetes                           | ODD_sensitive                                                                                                                                                                                                                                                                        |
| Pregnancy                          | MOMBABY <sup>2-5</sup>                                                                                                                                                                                                                                                               |
| Hypertension                       | HYPER                                                                                                                                                                                                                                                                                |
| Acute myocardial infarction        | ≥1 DAD ICD10: I21, I22, I25.2                                                                                                                                                                                                                                                        |
| Percutaneous coronary intervention | CIHI DAD/SDS: CCP: 48.02, 48.09; CCI: 11J50, 11J57GQ 11J80, 11J26, 11J54, 11J55; OHIP: Z434, Z448, Z449, Z460, Z461                                                                                                                                                                  |
| Coronary artery bypass surgery     | (CIHI DAD/SDS): CCI 11J76; CCP 48.1, 48.2; OHIP R742, R743                                                                                                                                                                                                                           |
| Ischemic stroke                    | One DAD, 2 OHIP, or 1 NACRS&1OHIP: ICD-10 codes I63, I64, H341 (excluding I63.6) as ANY diagnosis type, exclude suspect; ICD-9 code 434, 436 for OHIP                                                                                                                                |
| Hemorrhagic stroke                 | 1 record in DAD or NACRS: ICD-10 I60, I61; ICD-9 430, 431                                                                                                                                                                                                                            |
| Major bleeding event               | ICD 10:<br>GI: I850, I983, K250/252/254/256, K260/262/264/266, K270/272/274/276, K280/282/284/286, K290, K661, K920, K921, K922<br>ICH: I60, I61, I620, I621, I629<br>GU: N020-029, R310, R311, R318<br>Resp: R040, R041, R042, R048, R049<br>Other: R58, D68.3, H35.6, H45.0, M25.0 |
| Solid cancer, hematologic cancer   | OCR: OCR_TOPOG_CD, OCR_DIAG_DATE                                                                                                                                                                                                                                                     |
| Same-day surgery in prior 6 weeks  | SDS_ADMDATE, SDS_INCODE1-10, SDS_CACSANETECH                                                                                                                                                                                                                                         |
| Valvular disease                   | ICD9: 394, 395, 396<br>ICD10: I019, I020, I05, I08, I099, I342, I348, I349<br>ICD10 code Z952, and CCI codes 1HS90LACF, 1HT90LACF, 1HU90DACF, 1HU90LACF, 1HU90PNCF, 1HV90LACF, 1HV90LACFA, 1HV90LACFL, 1HV90LACFN, 1HV90WJCFN                                                        |
| Emphysema                          | COPD_SPECIFIC in COPD database                                                                                                                                                                                                                                                       |
| Asthma                             | ASTHMA_SPEC in ASTHMA database                                                                                                                                                                                                                                                       |
| Atrial fibrillation                | Any of the following:<br>-history of hospitalization (CIHI DAD) <sup>6</sup> : ICD9 427.3 or ICD10 I48 as any diagnosis type, including suspected<br>-history of ED visit with same codes<br>-4 OHIP claims in 1 year (OHIP) <i>dxcode</i> 427                                       |
| Heart failure                      | CHF database                                                                                                                                                                                                                                                                         |
| Ischemic heart disease             | PCI, CABG, (1 HOSP in DAD with any codes I20-I25) or (2 OHIP billings within a one-year period with dx codes 410-414)                                                                                                                                                                |
| Renal disease                      | DAD code: ICD10 codes E102, E112, E132, E142, I12, I13, N01.*, N03.*, N05.*, N08.*, N18.*, N19.*, N25.*<br>or<br>Chronic Dialysis (Any 2 codes within 90 days of one another):                                                                                                       |

Appendix 1, as supplied by the authors. Appendix to: McNaughton CD, Austin PC, Sivaswamy A, et al. Post-acute health care burden after SARS-CoV-2 infection: a retrospective cohort study. *CMAJ* 2022. doi: 10.1503/cmaj.220728. Copyright © 2022 The Author(s) or their employer(s). To receive this resource in an accessible format, please contact us at [cmajgroup@cmaj.ca](mailto:cmajgroup@cmaj.ca).

|                                |                                                                                                                                                                                                                                                                                                                                                                                                                                                                 |                                                                                                                     |
|--------------------------------|-----------------------------------------------------------------------------------------------------------------------------------------------------------------------------------------------------------------------------------------------------------------------------------------------------------------------------------------------------------------------------------------------------------------------------------------------------------------|---------------------------------------------------------------------------------------------------------------------|
|                                | OHIP: R849, R850, G323, G325, G326, G330, G331, G860, G333, G083, G091, G085, G295, G082, G090, G092, G093, G094, G861, G862, G863, G864, G865, G866, G294, G095, G096<br>CCP: 51.95, 66.98<br>NACRS: CCI: 1PZ21HQBR, 1PZ21HPD4                                                                                                                                                                                                                                 |                                                                                                                     |
| Pneumonia                      | (CIHI DAD, NACRS, OHIP) – ICD-10 codes J10.0, J11.0 or J12-J18 as ANY diagnosis type, exclude suspected <sup>7</sup> ; OHIP dxcode 486, excluding claims associated with fee codes G538, G539, G840-G848, G590, G591 or G700 (administration of vaccinations)                                                                                                                                                                                                   |                                                                                                                     |
| Dementia                       | (1 DAD or 3 OHIP billings separated by 30 days, within a 2-year period or any cholinesterase inhibitor from ODB)<br>ICD10 codes F00-F03, F051, G30, G31, R54<br>ICD9 code 290, 294, 331, 797<br>SUBCLNAM= CHOLINESTERASE INHIBITORS<br>ODB: donepezil, galantamine, or rivastigmine (DIN: 02232043, 02232044, 02269457, 02269465, 02244298, 02244299, 02244300, 02244302, 02266717, 02266725) or Tacrine (Cognex) (DIN: 66123288, 66123290, 66123306, 66123318) |                                                                                                                     |
| Alcohol substance use disorder | ICD10 codes F1094, F1029, F1019, F1099, F10250, F10150, F10950, F10920, F10929, F10251, F10251, F10151, F10951, F1027, F1097, F1026, F1096, F10129, F10120, F1010, F1021, F1020, F10220, F10229<br>ICD9 codes 291, 303                                                                                                                                                                                                                                          |                                                                                                                     |
| Johns Hopkins ACG score        | Sum of ADGs (from OHIP, NACRS-ED, CIHI DAD)                                                                                                                                                                                                                                                                                                                                                                                                                     |                                                                                                                     |
| John Hopkins frailty indicator | (OHIP, NACRS-ED CIHI DAD)                                                                                                                                                                                                                                                                                                                                                                                                                                       |                                                                                                                     |
| Influenza vaccination          | 2019-20 influenza vaccination (OHIP, ODB) – Received between Sep 1, 2019 and COVID test date. Use algorithm in Concept Dictionary and attached MOHLTC bulletin (pdf) for publically funded DINs for 2019-20 season. Note: algorithm does not capture vaccinations received outside doctor's offices and pharmacies                                                                                                                                              |                                                                                                                     |
| Venous thromboembolism         | CIHI-NACRS, DAD, OHIP                                                                                                                                                                                                                                                                                                                                                                                                                                           |                                                                                                                     |
|                                | ICD-10 Code                                                                                                                                                                                                                                                                                                                                                                                                                                                     | Description<br>DX10CODE1 in NACRS, DX10CODE1-10 in DAD                                                              |
|                                | I26.*                                                                                                                                                                                                                                                                                                                                                                                                                                                           | Pulmonary embolism                                                                                                  |
|                                | I26.0                                                                                                                                                                                                                                                                                                                                                                                                                                                           | Pulmonary embolism with mention of acute cor pulmonale                                                              |
|                                | I26.9                                                                                                                                                                                                                                                                                                                                                                                                                                                           | Pulmonary embolism without mention of acute cor pulmonale                                                           |
|                                | I80.*                                                                                                                                                                                                                                                                                                                                                                                                                                                           | Phlebitis and thrombophlebitis <sup>†</sup>                                                                         |
|                                | I80.1                                                                                                                                                                                                                                                                                                                                                                                                                                                           | Phlebitis and thrombophlebitis of femoral vein                                                                      |
|                                | I80.2                                                                                                                                                                                                                                                                                                                                                                                                                                                           | Phlebitis and thrombophlebitis of other deep vessels of lower extremities<br>- Deep vein thrombosis NOS             |
|                                | I80.3                                                                                                                                                                                                                                                                                                                                                                                                                                                           | Phlebitis and thrombophlebitis of lower extremities, unspecified<br>- Embolism or thrombosis of lower extremity NOS |
|                                | I80.8:                                                                                                                                                                                                                                                                                                                                                                                                                                                          | Phlebitis and thrombophlebitis of other sites;                                                                      |
|                                | I80.9:                                                                                                                                                                                                                                                                                                                                                                                                                                                          | Phlebitis and thrombophlebitis of unspecified site                                                                  |
|                                | I82.*                                                                                                                                                                                                                                                                                                                                                                                                                                                           | Other venous embolism and thrombosis <sup>‡</sup>                                                                   |
|                                | I82.2                                                                                                                                                                                                                                                                                                                                                                                                                                                           | Embolism and thrombosis of vena cava                                                                                |
|                                | I82.8                                                                                                                                                                                                                                                                                                                                                                                                                                                           | Embolism and thrombosis of other specified veins                                                                    |
|                                | I82.9                                                                                                                                                                                                                                                                                                                                                                                                                                                           | Embolism and thrombosis of unspecified vein<br>-Embolism of vein NOS<br>-Thrombosis of vein NOS                     |
|                                | OHIP DXCODE                                                                                                                                                                                                                                                                                                                                                                                                                                                     | Description                                                                                                         |
|                                | 415                                                                                                                                                                                                                                                                                                                                                                                                                                                             | Pulmonary embolism, pulmonary infarction                                                                            |
|                                | 451                                                                                                                                                                                                                                                                                                                                                                                                                                                             | Phlebitis, thrombophlebitis                                                                                         |
|                                | 452                                                                                                                                                                                                                                                                                                                                                                                                                                                             | Portal vein thrombosis                                                                                              |
|                                | 453                                                                                                                                                                                                                                                                                                                                                                                                                                                             | Other venous embolism and thrombosis                                                                                |
|                                | †Excludes: I80.0: Phlebitis and thrombophlebitis of superficial vessels of lower extremities<br>‡Excludes: I82.0: Budd-Chiari syndrome, I82.1: thrombophlebitis migrans. I82.3: Embolism and thrombosis of renal vein                                                                                                                                                                                                                                           |                                                                                                                     |
| Mental health                  | NACRS                                                                                                                                                                                                                                                                                                                                                                                                                                                           |                                                                                                                     |

Appendix 1, as supplied by the authors. Appendix to: McNaughton CD, Austin PC, Sivaswamy A, et al. Post-acute health care burden after SARS-CoV-2 infection: a retrospective cohort study. *CMAJ* 2022. doi: 10.1503/cmaj.220728. Copyright © 2022 The Author(s) or their employer(s). To receive this resource in an accessible format, please contact us at [cmajgroup@cmaj.ca](mailto:cmajgroup@cmaj.ca).

|                                                 |                                              |
|-------------------------------------------------|----------------------------------------------|
| inpatient stay                                  |                                              |
| Mental health ED visit                          | OHIP <sup>8-10</sup>                         |
| MHA Outpatient Services                         | OHIP <sup>8-10</sup>                         |
| Outpatient clinical encounters in previous year | OHIP                                         |
| ED visits in previous year                      | DAD, NACRS                                   |
| Same-day surgery in previous year               | SDS_ADMDATE, SDS_INCODE1-10, SDS_CACSANETECH |
| Days hospitalized in previous year              | DAD                                          |
| Homecare encounters in previous year            | HCD                                          |

**Table E3:** Unmatched cohort, baseline characteristics

| VARIABLE                             |              | Negative SARS-CoV-2 PCR | Positive SARS-CoV-2 PCR | Total             | Standardized Difference |
|--------------------------------------|--------------|-------------------------|-------------------------|-------------------|-------------------------|
|                                      |              | N=3,362,519             | N=268,521               | N=3,631,040       |                         |
| Age, years                           | Mean ± SD    | 46.77 ± 18.17           | 44.18 ± 17.18           | 46.58 ± 18.11     | 0.15                    |
|                                      | Median (IQR) | 45 (31-60)              | 43 (29-56)              | 45 (31-60)        | 0.14                    |
| Women, n (%)                         |              | 1,864,241 (55.4%)       | 137,245 (51.1%)         | 2,001,486 (55.1%) | 0.09                    |
| Income Quintile, n (%)               | Missing      | 10,050 (0.3%)           | 774 (0.3%)              | 10,824 (0.3%)     | 0                       |
|                                      | 1            | 630,532 (18.8%)         | 66,584 (24.8%)          | 697,116 (19.2%)   | 0.15                    |
|                                      | 2            | 649,204 (19.3%)         | 58,115 (21.6%)          | 707,319 (19.5%)   | 0.06                    |
|                                      | 3            | 672,162 (20.0%)         | 57,233 (21.3%)          | 729,395 (20.1%)   | 0.03                    |
|                                      | 4            | 684,228 (20.3%)         | 47,450 (17.7%)          | 731,678 (20.2%)   | 0.07                    |
|                                      | 5            | 716,343 (21.3%)         | 38,365 (14.3%)          | 754,708 (20.8%)   | 0.18                    |
| Instability Quintile, n (%)          | Missing      | 37,365 (1.1%)           | 2,063 (0.8%)            | 39,428 (1.1%)     | 0.04                    |
|                                      | 1            | 691,223 (20.6%)         | 72,327 (26.9%)          | 763,550 (21.0%)   | 0.15                    |
|                                      | 2            | 626,597 (18.6%)         | 44,606 (16.6%)          | 671,203 (18.5%)   | 0.05                    |
|                                      | 3            | 610,179 (18.1%)         | 40,798 (15.2%)          | 650,977 (17.9%)   | 0.08                    |
|                                      | 4            | 610,967 (18.2%)         | 43,693 (16.3%)          | 654,660 (18.0%)   | 0.05                    |
|                                      | 5            | 786,188 (23.4%)         | 65,034 (24.2%)          | 851,222 (23.4%)   | 0.02                    |
| Deprivation Quintile, n (%)          | Missing      | 37,365 (1.1%)           | 2,063 (0.8%)            | 39,428 (1.1%)     | 0.04                    |
|                                      | 1            | 802,901 (23.9%)         | 45,106 (16.8%)          | 848,007 (23.4%)   | 0.18                    |
|                                      | 2            | 708,278 (21.1%)         | 47,637 (17.7%)          | 755,915 (20.8%)   | 0.08                    |
|                                      | 3            | 632,209 (18.8%)         | 52,504 (19.6%)          | 684,713 (18.9%)   | 0.02                    |
|                                      | 4            | 594,666 (17.7%)         | 55,590 (20.7%)          | 650,256 (17.9%)   | 0.08                    |
|                                      | 5            | 587,100 (17.5%)         | 65,621 (24.4%)          | 652,721 (18.0%)   | 0.17                    |
| Dependency Quintile, n (%)           | Missing      | 37,365 (1.1%)           | 2,063 (0.8%)            | 39,428 (1.1%)     | 0.04                    |
|                                      | 1            | 901,394 (26.8%)         | 91,929 (34.2%)          | 993,323 (27.4%)   | 0.16                    |
|                                      | 2            | 671,373 (20.0%)         | 59,930 (22.3%)          | 731,303 (20.1%)   | 0.06                    |
|                                      | 3            | 582,059 (17.3%)         | 44,238 (16.5%)          | 626,297 (17.2%)   | 0.02                    |
|                                      | 4            | 557,097 (16.6%)         | 37,506 (14.0%)          | 594,603 (16.4%)   | 0.07                    |
|                                      | 5            | 613,231 (18.2%)         | 32,855 (12.2%)          | 646,086 (17.8%)   | 0.17                    |
| Ethnic Concentration Quintile, n (%) | Missing      | 37,365 (1.1%)           | 2,063 (0.8%)            | 39,428 (1.1%)     | 0.04                    |

Appendix 1, as supplied by the authors. Appendix to: McNaughton CD, Austin PC, Sivaswamy A, et al. Post-acute health care burden after SARS-CoV-2 infection: a retrospective cohort study. *CMAJ* 2022. doi: 10.1503/cmaj.220728. Copyright © 2022 The Author(s) or their employer(s). To receive this resource in an accessible format, please contact us at [cmajgroup@cmaj.ca](mailto:cmajgroup@cmaj.ca).

|                                    |              |                   |                 |                   |      |
|------------------------------------|--------------|-------------------|-----------------|-------------------|------|
|                                    | 1            | 535,172 (15.9%)   | 17,294 (6.4%)   | 552,466 (15.2%)   | 0.3  |
|                                    | 2            | 579,980 (17.2%)   | 24,901 (9.3%)   | 604,881 (16.7%)   | 0.24 |
|                                    | 3            | 635,538 (18.9%)   | 35,134 (13.1%)  | 670,672 (18.5%)   | 0.16 |
|                                    | 4            | 726,900 (21.6%)   | 57,068 (21.3%)  | 783,968 (21.6%)   | 0.01 |
|                                    | 5            | 847,564 (25.2%)   | 132,061 (49.2%) | 979,625 (27.0%)   | 0.51 |
| Rural, n (%)                       | Missing      | 8,780 (0.3%)      | 671 (0.2%)      | 9,451 (0.3%)      | 0    |
|                                    |              | 339,985 (10.1%)   | 10,538 (3.9%)   | 350,523 (9.7%)    | 0.24 |
| Pandemic Quarter                   | 2020-Q1      | 19,479 (0.6%)     | 3,457 (1.3%)    | 22,936 (0.6%)     | 0.07 |
|                                    | 2020-Q2      | 297,938 (8.9%)    | 21,179 (7.9%)   | 319,117 (8.8%)    | 0.04 |
|                                    | 2020-Q3      | 686,688 (20.4%)   | 14,775 (5.5%)   | 701,463 (19.3%)   | 0.46 |
|                                    | 2020-Q4      | 972,169 (28.9%)   | 104,177 (38.8%) | 1,076,346 (29.6%) | 0.21 |
|                                    | 2021-Q1      | 1,386,245 (41.2%) | 124,933 (46.5%) | 1,511,178 (41.6%) | 0.11 |
| Received 2 vaccine doses, n (%)    |              | 71,870 (2.1%)     | 300 (0.1%)      | 72,170 (2.0%)     | 0.19 |
| Received 1 vaccine dose, n (%)     |              | 78,444 (2.3%)     | 1,403 (0.5%)    | 79,847 (2.2%)     | 0.15 |
| Received 0 vaccine doses, n (%)    |              | 3,212,205 (95.5%) | 266,818 (99.4%) | 3,479,023 (95.8%) | 0.25 |
| Aggregated diagnosis group         | Mean ± SD    | 5.82 ± 3.80       | 5.59 ± 3.69     | 5.81 ± 3.79       | 0.06 |
|                                    | Median (IQR) | 5 (3-8)           | 5 (3-8)         | 5 (3-8)           | 0.06 |
| Hospital Frailty Risk Score        | Mean ± SD    | 2.42 ± 4.76       | 2.40 ± 5.03     | 2.42 ± 4.78       | 0    |
|                                    | Median (IQR) | 0 (0-3)           | 0 (0-2)         | 0 (0-3)           | 0.06 |
| Hospitalizations in prior year     | Mean ± SD    | 0.10 ± 0.45       | 0.07 ± 0.39     | 0.10 ± 0.44       | 0.07 |
|                                    | Median (IQR) | 0 (0-0)           | 0 (0-0)         | 0 (0-0)           | 0.09 |
| Clinic visits in prior year        | Mean ± SD    | 6.56 ± 8.35       | 6.27 ± 7.86     | 6.54 ± 8.32       | 0.04 |
|                                    | Median (IQR) | 4 (1-9)           | 4 (1-9)         | 4 (1-9)           | 0.03 |
| Homecare visits in prior year      | Mean ± SD    | 3.10 ± 25.71      | 2.92 ± 26.23    | 3.09 ± 25.75      | 0.01 |
|                                    | Median (IQR) | 0 (0-0)           | 0 (0-0)         | 0 (0-0)           | 0.07 |
| ED visits in prior year            | Mean ± SD    | 0.50 ± 1.45       | 0.41 ± 1.42     | 0.49 ± 1.45       | 0.06 |
|                                    | Median (IQR) | 0 (0-1)           | 0 (0-0)         | 0 (0-1)           | 0.08 |
| Days hospitalized in prior year    | Mean ± SD    | 1.02 ± 6.85       | 0.83 ± 7.88     | 1.00 ± 6.93       | 0.03 |
|                                    | Median (IQR) | 0 (0-0)           | 0 (0-0)         | 0 (0-0)           | 0.15 |
| Hospitalized within 2 weeks, n (%) |              | 246,238 (7.3%)    | 14,942 (5.6%)   | 261,180 (7.2%)    | 0.07 |

Appendix 1, as supplied by the authors. Appendix to: McNaughton CD, Austin PC, Sivaswamy A, et al. Post-acute health care burden after SARS-CoV-2 infection: a retrospective cohort study. *CMAJ* 2022. doi: 10.1503/cmaj.220728. Copyright © 2022 The Author(s) or their employer(s). To receive this resource in an accessible format, please contact us at [cmajgroup@cmaj.ca](mailto:cmajgroup@cmaj.ca).

|                                                       |                   |                |                   |      |
|-------------------------------------------------------|-------------------|----------------|-------------------|------|
| Admitted to intensive care unit within 2 weeks, n (%) | 31,068 (0.9%)     | 2,933 (1.1%)   | 34,001 (0.9%)     | 0.02 |
| Johns Hopkins Frailty Index, n (%)                    | 116,104 (3.5%)    | 7,895 (2.9%)   | 123,999 (3.4%)    | 0.03 |
| Flu vaccine within prior year, n (%)                  | 1,064,518 (31.7%) | 66,351 (24.7%) | 1,130,869 (31.1%) | 0.15 |
| Pregnancy, n (%)                                      | 29,558 (0.9%)     | 1,855 (0.7%)   | 31,413 (0.9%)     | 0.02 |
| Hypertension, n (%)                                   | 816,144 (24.3%)   | 61,708 (23.0%) | 877,852 (24.2%)   | 0.03 |
| Diabetes, n (%)                                       | 395,575 (11.8%)   | 37,775 (14.1%) | 433,350 (11.9%)   | 0.07 |
| Emphysema, n (%)                                      | 93,686 (2.8%)     | 4,138 (1.5%)   | 97,824 (2.7%)     | 0.09 |
| Heart failure, n (%)                                  | 88,669 (2.6%)     | 4,994 (1.9%)   | 93,663 (2.6%)     | 0.05 |
| Dementia, n (%)                                       | 42,410 (1.3%)     | 3,274 (1.2%)   | 45,684 (1.3%)     | 0    |
| Asthma, n (%)                                         | 414,612 (12.3%)   | 28,270 (10.5%) | 442,882 (12.2%)   | 0.06 |
| Cancer, n (%)                                         | 112,188 (3.3%)    | 4,809 (1.8%)   | 116,997 (3.2%)    | 0.1  |
| Surgery in prior 6 weeks, n (%)                       | 57,709 (1.7%)     | 2,215 (0.8%)   | 59,924 (1.7%)     | 0.08 |
| Ischemic stroke, n (%)                                | 42,908 (1.3%)     | 2,547 (0.9%)   | 45,455 (1.3%)     | 0.03 |
| Hemorrhagic stroke, n (%)                             | 3,533 (0.1%)      | 224 (0.1%)     | 3,757 (0.1%)      | 0.01 |
| Valvular disease, n (%)                               | 4,609 (0.1%)      | 235 (0.1%)     | 4,844 (0.1%)      | 0.01 |
| Atrial fibrillation, n (%)                            | 93,557 (2.8%)     | 4,896 (1.8%)   | 98,453 (2.7%)     | 0.06 |
| Myocardial infarction, n (%)                          | 33,446 (1.0%)     | 1,801 (0.7%)   | 35,247 (1.0%)     | 0.04 |
| Percutaneous coronary intervention, n (%)             | 39,373 (1.2%)     | 2,231 (0.8%)   | 41,604 (1.1%)     | 0.03 |
| Coronary artery bypass, n (%)                         | 11,845 (0.4%)     | 648 (0.2%)     | 12,493 (0.3%)     | 0.02 |
| Ischemic heart disease, n (%)                         | 167,514 (5.0%)    | 9,846 (3.7%)   | 177,360 (4.9%)    | 0.06 |
| Major bleeding, n (%)                                 | 37,210 (1.1%)     | 2,156 (0.8%)   | 39,366 (1.1%)     | 0.03 |
| Renal disease, n (%)                                  | 43,949 (1.3%)     | 2,779 (1.0%)   | 46,728 (1.3%)     | 0.03 |
| Pneumonia, n (%)                                      | 271,036 (8.1%)    | 20,166 (7.5%)  | 291,202 (8.0%)    | 0.02 |
| Alcohol use disorder, n (%)                           | 27,759 (0.8%)     | 1,668 (0.6%)   | 29,427 (0.8%)     | 0.02 |
| Venous thromboembolism, n (%)                         | 396,371 (11.8%)   | 24,085 (9.0%)  | 420,456 (11.6%)   | 0.09 |



**Table E4:** Analyses not stratified by sex (N=531,702)\*: (A) Rate ratios\*\*, (B) Absolute differences in per-person-year rates\*\*\*

| <b>(A) Rate ratios** for health care events <math>\geq</math>56 days after SARS-CoV-2 PCR</b> |           |               |                |  |
|-----------------------------------------------------------------------------------------------|-----------|---------------|----------------|--|
|                                                                                               | <b>RR</b> | <b>95% CI</b> | <b>P-value</b> |  |
| Days hospitalized                                                                             | 1.50      | (1.42, 1.58)  | <.0001         |  |
| Outpatient encounters                                                                         | 1.05      | (1.04, 1.05)  | <.0001         |  |
| Homecare encounters                                                                           | 0.99      | (0.95, 1.03)  | 0.6            |  |
| Emergency department visits                                                                   | 1.03      | (1.01, 1.05)  | 0.003          |  |
| Long-term care days                                                                           | 2.23      | (2.01, 2.48)  | <0.0001        |  |
| Total Healthcare Use                                                                          | 1.10      | (1.08, 1.12)  | <.0001         |  |

  

| <b>(B) Absolute differences in per-person-year rates of health care events</b> |                                     |                |                                                |                  |
|--------------------------------------------------------------------------------|-------------------------------------|----------------|------------------------------------------------|------------------|
| <b>Rates (per person-year)</b>                                                 | <b><math>\Delta</math> for mean</b> | <b>95% CI</b>  | <b><math>\Delta</math> for 99th percentile</b> | <b>95% CI</b>    |
| Days hospitalized                                                              | +0.41                               | (+0.35, +0.48) | +7.41                                          | (+6.07, +8.78)   |
| Outpatient encounters                                                          | +0.32                               | (+0.26, +0.37) | -0.10                                          | (-0.80, +0.66)   |
| Homecare encounters                                                            | -0.05                               | (-0.23, +0.13) | -0.45                                          | (-18.15, +14.97) |
| Emergency department visits                                                    | +0.01                               | (-0.00, +0.01) | 0.03                                           | (-0.07, +0.11)   |
| Long-term care days                                                            | +0.65                               | (+0.65, +0.73) | 0.0                                            | (0.0, 0.0)       |
| Total Healthcare Use***                                                        | +1.33                               | (+1.10, +1.57) | +64.48                                         | (+50.32, +76.26) |
| (Days of follow-up)                                                            | 240                                 |                | 495                                            |                  |

\* All comparisons are for test-positive versus test-negative individuals

\*\* Point estimate and confidence intervals computed using negative binomial regression models after accounting for matching.

\*\*\* Mean total health care use may differ from summary of component use due to rounding errors. 99<sup>th</sup> percentiles are not additive.

Abbreviations: SARS-CoV-2 PCR, severe acute respiratory syndrome coronavirus 2 polymerase chain reaction; RR, rate ratio; CI, confidence interval

**Table E5:** Sensitivity analyses\*: (A) Follow-up begins after hospital discharge or 56 days, whichever occurred later, (B) follow-up censored on the date of entrance to long-term care, and (C) follow-up censored at 6 months

| <b>Sensitivity analysis (A): Follow-up <math>\geq</math>56 days (after hospital discharge)</b> |                                     |                                                |
|------------------------------------------------------------------------------------------------|-------------------------------------|------------------------------------------------|
| <b>Rates (per person-year)</b>                                                                 | <b><math>\Delta</math> for mean</b> | <b><math>\Delta</math> for 99th percentile</b> |
| Days hospitalized                                                                              | +0.27                               | +2.55                                          |
| Outpatient encounters                                                                          | +0.33                               | -0.10                                          |
| Homecare encounters                                                                            | -0.02                               | +1.18                                          |
| Emergency department visits                                                                    | +0.01                               | +0.03                                          |
| Long-term care days                                                                            | +0.69                               | 0.0                                            |
| Total Healthcare Use**                                                                         | +1.27                               | +63.6                                          |
| <b>Sensitivity analysis (B): Follow-up censored at entrance to long-term care</b>              |                                     |                                                |
| <b>Rates (per person-year)</b>                                                                 | <b><math>\Delta</math> for mean</b> | <b><math>\Delta</math> for 99th percentile</b> |
| Days hospitalized                                                                              | +0.64                               | +8.13                                          |
| Outpatient encounters                                                                          | +0.33                               | +0.06                                          |
| Homecare encounters                                                                            | +0.03                               | +5.4                                           |
| Emergency department visits                                                                    | +0.01                               | +0.02                                          |
| Long-term care days                                                                            | Not applicable                      | Not applicable                                 |
| Total Healthcare Use**                                                                         | +1.01                               | +47.46                                         |
| <b>Sensitivity analysis (C) Follow-up censored at 6 months</b>                                 |                                     |                                                |
| <b>Rates (per person-year)</b>                                                                 | <b><math>\Delta</math> for mean</b> | <b><math>\Delta</math> for 99th percentile</b> |
| Days hospitalized                                                                              | +0.52                               | +10.09                                         |
| Outpatient encounters                                                                          | +0.40                               | 0.0                                            |
| Homecare encounters                                                                            | -0.07                               | -7.23                                          |
| Emergency department visits                                                                    | +0.02                               | 0.0                                            |
| Long-term care days                                                                            | +0.55                               | 0.0                                            |
| Total Healthcare Use**                                                                         | +1.42                               | +66.10                                         |

\* All comparisons are for test-positive versus test-negative individuals

\*\* Mean total health care use may differ from summary of component use due to rounding errors. 99<sup>th</sup> percentiles of health care use are not additive.

**Table E6:** Sensitivity analyses in cohort constructed with matching by hospitalization within 2 weeks after PCR test\*: (A) Follow-up begins after hospital discharge or 56 days, whichever occurred later, (B) follow-up censored on the date of entrance to long-term care, (C) follow-up censored at 6 months, and (D) matched by intensive care admission within two weeks after index date.

| Rates (per person-year)                                                                       | SARS-CoV-2 Positive PCR Test Result                                                        | Mean | Δ for mean | p95  | Δ for 95th percentile | p99   | Δ for 99th percentile |
|-----------------------------------------------------------------------------------------------|--------------------------------------------------------------------------------------------|------|------------|------|-----------------------|-------|-----------------------|
|                                                                                               | <b>Sensitivity analysis (A): Follow-up ≥56 days (after hospital discharge) (n=530,232)</b> |      |            |      |                       |       |                       |
| Total healthcare events**                                                                     | Negative                                                                                   | 12.8 |            | 34.5 |                       | 264.4 |                       |
|                                                                                               | Positive                                                                                   | 14.2 | 1.3        | 36.4 | 1.8                   | 335.4 | 71.0                  |
| Outpatient clinical encounters                                                                | Negative                                                                                   | 7.1  |            | 24.7 |                       | 45.1  |                       |
|                                                                                               | Positive                                                                                   | 7.4  | 0.3        | 25.2 | 0.6                   | 45.0  | -0.1                  |
| Homecare encounters                                                                           | Negative                                                                                   | 4.1  |            | 0.0  |                       | 167.4 |                       |
|                                                                                               | Positive                                                                                   | 4.2  | 0.0        | 0.0  | 0.0                   | 169.6 | 2.2                   |
| Emergency department visits                                                                   | Negative                                                                                   | 0.4  |            | 2.5  |                       | 5.4   |                       |
|                                                                                               | Positive                                                                                   | 0.4  | 0.0        | 2.4  | 0.0                   | 5.5   | 0.1                   |
| Days hospitalized                                                                             | Negative                                                                                   | 0.7  |            | 1.7  |                       | 13.8  |                       |
|                                                                                               | Positive                                                                                   | 1.0  | 0.3        | 1.8  | 0.1                   | 16.0  | 2.2                   |
| Days in long-term care                                                                        | Negative                                                                                   | 0.5  |            | 0.0  |                       | 0.0   |                       |
|                                                                                               | Positive                                                                                   | 1.2  | 0.7        | 0.0  | 0.0                   | 0.0   | 0.0                   |
| Follow-up (days)                                                                              | Negative                                                                                   | 240  |            | 457  |                       | 495   |                       |
|                                                                                               | Positive                                                                                   | 240  |            | 457  |                       | 494   |                       |
| <b>Sensitivity analysis (B): Follow-up censored at entrance to long-term care (n=530,232)</b> |                                                                                            |      |            |      |                       |       |                       |
| Rates (per person-year)                                                                       |                                                                                            | Mean | Δ for mean | p95  | Δ for 95th percentile | p99   | Δ for 99th percentile |
| Total healthcare utilization*                                                                 | Negative                                                                                   | 12.5 |            | 34.2 |                       | 243.5 |                       |
|                                                                                               | Positive                                                                                   | 13.6 | 1.1        | 35.7 | 1.5                   | 297.5 | 54.0                  |
| Outpatient clinical encounters                                                                | Negative                                                                                   | 7.1  |            | 24.7 |                       | 45.2  |                       |
|                                                                                               | Positive                                                                                   | 7.4  | 0.3        | 25.4 | 0.7                   | 45.2  | 0.0                   |
| Homecare encounters                                                                           | Negative                                                                                   | 4.2  |            | 0.0  |                       | 172.1 |                       |
|                                                                                               | Positive                                                                                   | 4.3  | 0.1        | 0.0  | 0.0                   | 182.6 | 10.5                  |
| Emergency department visits                                                                   | Negative                                                                                   | 0.4  |            | 2.5  |                       | 5.4   |                       |
|                                                                                               | Positive                                                                                   | 0.4  | 0.0        | 2.4  | 0.0                   | 5.5   | 0.1                   |
| Days hospitalized                                                                             | Negative                                                                                   | 0.8  |            | 1.7  |                       | 14.5  |                       |
|                                                                                               | Positive                                                                                   | 1.5  | 0.6        | 1.9  | 0.1                   | 22.1  | 7.6                   |
| Days in long-term care                                                                        | Negative                                                                                   | .    |            | .    |                       | .     |                       |
|                                                                                               | Positive                                                                                   | .    |            | .    |                       | .     |                       |
| Follow-up (days)                                                                              | Negative                                                                                   | 240  |            | 457  |                       | 495   |                       |
|                                                                                               | Positive                                                                                   | 239  |            | 457  |                       | 494   |                       |
| <b>Sensitivity analysis (C) Follow-up censored at 6 months (n=530,232)</b>                    |                                                                                            |      |            |      |                       |       |                       |
| Rates (per person-year)                                                                       |                                                                                            | Mean | Δ for mean | p95  | Δ for 95th percentile | p99   | Δ for 99th percentile |
| Total healthcare utilization*                                                                 | Negative                                                                                   | 12.8 |            | 35.1 |                       | 264.4 |                       |
|                                                                                               | Positive                                                                                   | 14.3 | 4.4        | 38.3 | 3.2                   | 337.0 | 72.6                  |
| Outpatient clinical encounters                                                                | Negative                                                                                   | 7.1  |            | 26.2 |                       | 46.4  |                       |
|                                                                                               | Positive                                                                                   | 7.5  | 0.3        | 26.2 | 0.0                   | 46.4  | 0.0                   |
| Homecare encounters                                                                           | Negative                                                                                   | 4.1  |            | 0.0  |                       | 167.5 |                       |
|                                                                                               | Positive                                                                                   | 4.1  | -0.1       | 0.0  | 0.0                   | 163.5 | -4.0                  |

Appendix 1, as supplied by the authors. Appendix to: McNaughton CD, Austin PC, Sivaswamy A, et al. Post-acute health care burden after SARS-CoV-2 infection: a retrospective cohort study. *CMAJ* 2022. doi: 10.1503/cmaj.220728. Copyright © 2022 The Author(s) or their employer(s). To receive this resource in an accessible format, please contact us at [cmajgroup@cmaj.ca](mailto:cmajgroup@cmaj.ca).

|                             |          |     |     |     |     |      |     |
|-----------------------------|----------|-----|-----|-----|-----|------|-----|
| Emergency department visits | Negative | 0.4 |     | 2.2 |     | 6.1  |     |
|                             | Positive | 0.4 | 0.2 | 2.1 | 0.0 | 6.1  | 0.0 |
| Days hospitalized           | Negative | 0.8 |     | 2.0 |     | 14.1 |     |
|                             | Positive | 1.3 | 4.7 | 2.0 | 0.0 | 22.2 | 8.1 |
| Days in long-term care      | Negative | 0.4 |     | 0.0 |     | 0.0  |     |
|                             | Positive | 1.0 | 6.4 | 0.0 | 0.0 | 0.0  | 0.0 |
| <b>Follow-up (days)</b>     | Negative | 174 |     | 181 |     | 181  |     |
|                             | Positive | 174 |     | 181 |     | 181  |     |

---

**Sensitivity analysis (D) Matched by intensive care unit admission within 2 weeks after index date (n=508,662)**

---

| <b>Rates (per person-year)</b> |          | <b>Mean</b> | <b>Δ for mean</b> | <b>p95</b> | <b>Δ for 95th percentile</b> | <b>p99</b> | <b>Δ for 99th percentile</b> |
|--------------------------------|----------|-------------|-------------------|------------|------------------------------|------------|------------------------------|
| Total healthcare utilization*  | Negative | 12.8        |                   | 34.5       |                              | 268.1      |                              |
|                                | Positive | 14.1        | 1.3               | 36.2       | 1.7                          | 332.5      | 64.4                         |
| Outpatient clinical encounters | Negative | 7.1         |                   | 24.6       |                              | 45.3       |                              |
|                                | Positive | 7.4         | 0.3               | 25.2       | 0.6                          | 44.9       | -0.4                         |
| Homecare encounters            | Negative | 4.1         |                   | 0.0        |                              | 163.5      |                              |
|                                | Positive | 4.1         | 0.0               | 0.0        | 0.0                          | 161.4      | -2.2                         |
| Emergency department visits    | Negative | 0.4         |                   | 2.5        |                              | 5.4        |                              |
|                                | Positive | 0.4         | 0.0               | 2.4        | 0.0                          | 5.5        | 0.0                          |
| Days hospitalized              | Negative | 0.8         |                   | 1.7        |                              | 13.9       |                              |
|                                | Positive | 1.1         | 0.4               | 1.8        | 0.1                          | 20.1       | 6.2                          |
| Days in long-term care         | Negative | 0.5         |                   | 0.0        |                              | 0.0        |                              |

---

\* All comparisons are for test-positive versus test-negative individuals. Distribution of follow-up time included for each analysis. Healthcare utilization rates reported per person-year. The difference in overall healthcare utilization rates between test-positive and negative individuals are reported for the mean, 95th percentile, and 99th percentiles. Samples sizes as noted.

\*\* Mean total health care use may differ from summary of component use due to rounding errors. 99<sup>th</sup> percentiles are not additive.

**Figure E1:** Differences in rates (per-person-year) of health care use among individuals at the 99<sup>th</sup> percentile of health care utilization, comparing individuals with a positive SARS-CoV-2 PCR test to matched individuals with negative PCR: (A) females (n=271,966), and (B) males (n=259,736).

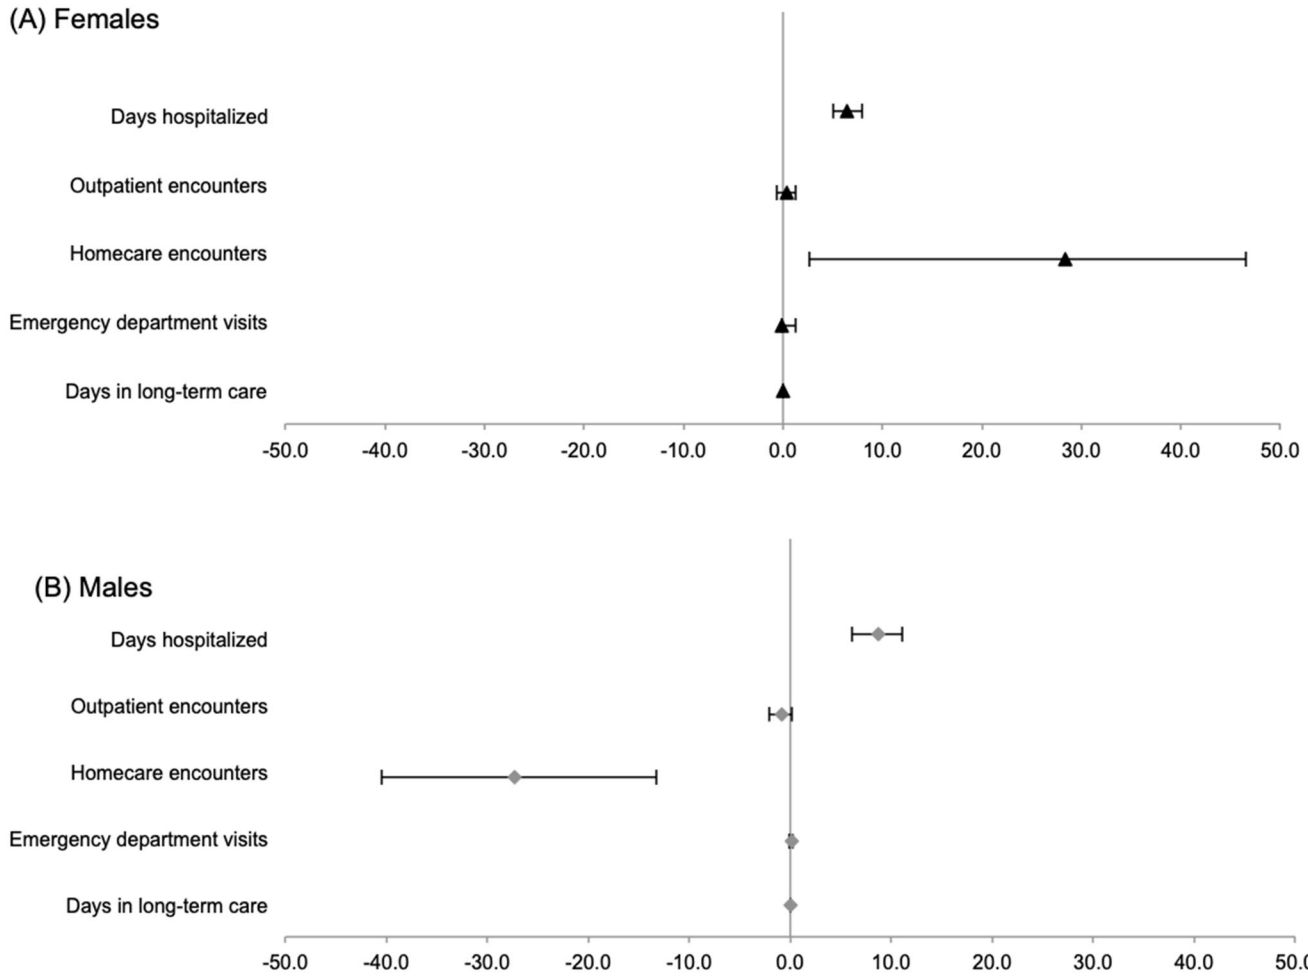

Supplement: 220728-res-1-at.pdf [file 220728-res-1-at.pdf]
